# Supplementary material for: Mathematical modeling of hepatitis C RNA replication, exosome secretion and virus release
Source: PLoS Comput Biol. 2020 Nov 5;16(11):e1008421. doi: 10.1371/journal.pcbi.1008421 (PMC7671504; doi:10.1371/journal.pcbi.1008421)
Supplement: S3 Table — AICs, number of estimated model parameters (#P), time delay parameters (kρi,τρi,ρi) values of the best-fit models that take into account the secretion of (-)RNA and were fitted to measurements of plus-strand RNA, minus-strand RNA, and secreted HCV RNA in Keum et al. [35]. The model with the lowest AIC is highlighted in beige and the lowest AIC for each model is shown in bold. (DOCX) [file pcbi.1008421.s013.docx]

| Model | Secretion route | Time delay function | #P |  |  |  | AIC |
| --- | --- | --- | --- | --- | --- | --- | --- |
| SMC1 | (-)RNA secretion from the RC () | Delay then ramp-up (Eq. 2) | 11 |  |  |  | 192.9 |
| SMC2 | Simple delay (Eq. 3) | 10 | - |  |  | **190.0** |
| SMC3 | Delayed exponential decrease (Eq. 4) | 11 |  |  |  | 193.7 |
| SMT1=C1 | (-)RNA and (+)RNA secretion from the RC () and the site of translation () with and | Delay then ramp-up (Eq. 2) | 11 |  |  |  | **115.7** |
| SMT2=C2 | Simple delay (Eq. 3) | 10 | - |  |  | 133.1 |
| SMT3=C3 | Delayed exponential decrease (Eq. 4) | 11 |  |  |  | 136.1 |
| SMT1≠C1 | (-)RNA and (+)RNA secretion from the RC () and the site of translation () with and | Delay then ramp-up (Eq. 2) | 13 |  |  |  | **105.5** |
| SMT2≠C2 | Simple delay (Eq. 3) | 12 | - |  |  | 113.8 |
| SMT3≠C3 | Delayed exponential decrease (Eq. 4) | 13 |  |  |  | 116.8 |
| SMT1=R1=C1 | (-)RNA and (+)RNA secretion from the RC () and the site of translation () with and | Delay then ramp-up (Eq. 2) | 11 |  |  |  | 113.1 |
| SMT2=R2=C2 | Simple delay (Eq. 3) | 10 | - |  |  | **110.5** |
| SMT3=R3=C1 | Delayed exponential decrease (Eq. 4) | 11 |  |  |  | 112.8 |
| SMT1≠R1≠C1 | (-)RNA and (+)RNA secretion from the RC () and the site of translation () with and | Delay then ramp-up (Eq. 2) | 15 |  |  |  | **76.9** |
| SMT2≠R2≠C2 | Simple delay (Eq. 3) | 14 | - |  |  | 89.7 |
| SMT3≠R3≠C3 | Delayed exponential decrease (Eq. 4) | 15 |  |  |  | 102.7 |
| SMT1≠R1≠C1 | (-)RNA and (+)RNA secretion from the RC () and the site of translation () with and and | Delay then ramp-up (Eq. 2) | 17 |  |  |  | **78.8** |
